# Supplementary material for: Fluorescent probe for imaging intercellular tension: molecular force approach
Source: Royal Society of Chemistry journal article supplement (doi:10.1039/d4ra02647k), 2024-01-01
Supplement: d4ra02647k1.pdf [file d4ra02647k1.pdf]

## Fluorescent Probe for Imaging Intercellular Tension: Molecular Force Approach

Xiao-Hong Wang<sup>\*a</sup>, Ming Wang<sup>b</sup>, Jian-bin Pan<sup>c</sup>, Jin-miao Zhu<sup>a</sup>, Hu Cheng<sup>a</sup>, Hua-ze Dong<sup>a</sup>, Wen-jie Bi<sup>a</sup>, Shi-wei Yang<sup>a</sup>, Yuan-yuan chen<sup>a</sup>, Fan Xu<sup>a</sup>, Xiao-jing Duan<sup>a</sup>

<sup>a</sup> *Department of Chemistry and Chemical Engineering, Hefei Normal University, 230061, Hefei, Anhui, China*

<sup>b</sup> *School of Energy Materials and Chemical Engineering, Hefei University, Hefei 230601, China*

<sup>c</sup> *State Key Laboratory of Analytical Chemistry for Life Science and Collaborative Innovation Center of Chemistry for Life Sciences, School of Chemistry and Chemical Engineering, Nanjing University, 210023, China.*

\* Corresponding author. Tel/Fax:+86-551-6367-6145 ;

Email address: wangxiho@126.com

## 1. Drug treatment

For inhibitor research, ROCK inhibitor Y27632 (30  $\mu\text{M}$ ) and MLCK inhibitor ML-7 (40  $\mu\text{M}$ ) were used. The cell was incubated with Au-DNA tension probe, then washed, and treated with Y27632 (30  $\mu\text{M}$ ) or ML-7 (40  $\mu\text{M}$ ). After ML-7 (40  $\mu\text{M}$ ), the fluorescence image was taken overtime.

## 2. Supplemental Figures

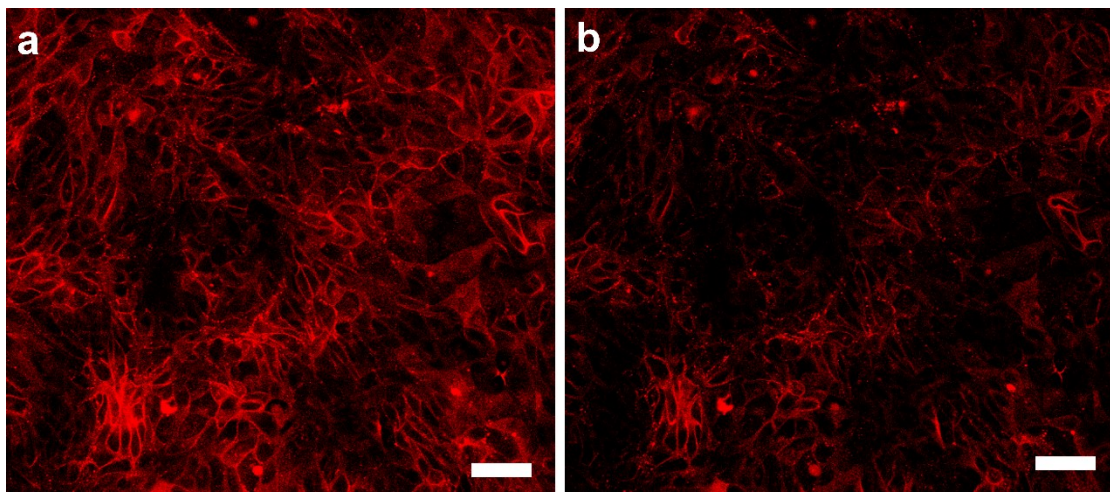

Figure S1. The cells are treated with MLCK inhibitor. Representative fluorescence images showed the change of Au-DNA intercellular tension probe before (a) and after (b) ML-7 treatment 30 min.

Scale bar: 50  $\mu\text{m}$ .
